# Supplementary material
Source: PubMed Central journal article supplement (PMC3717543)

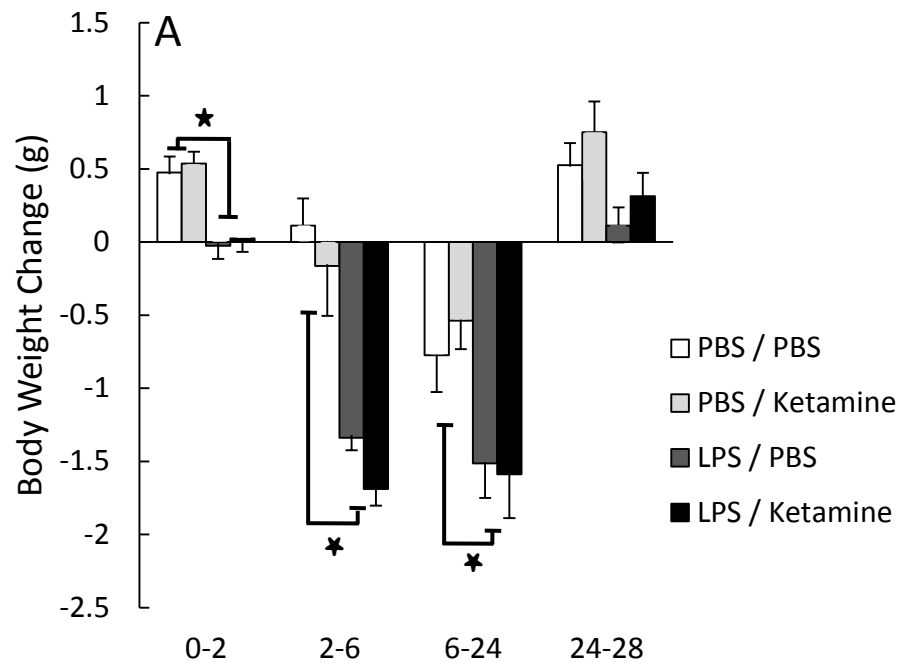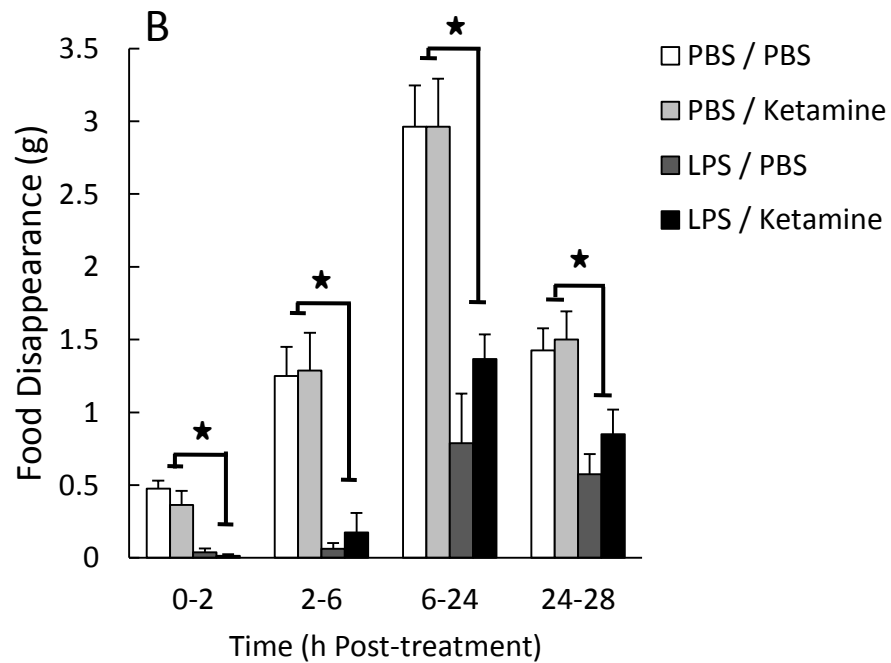

Figure S1.

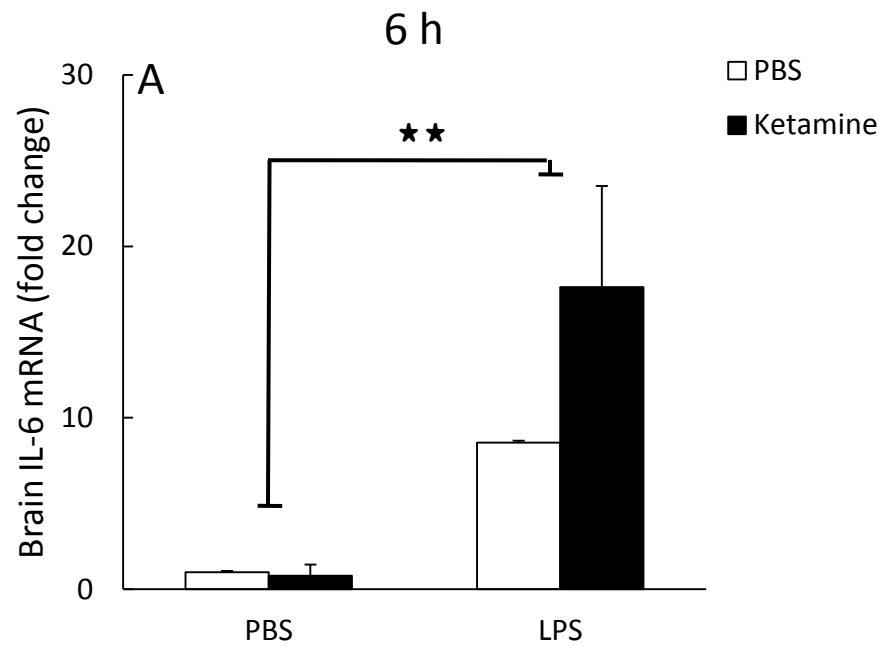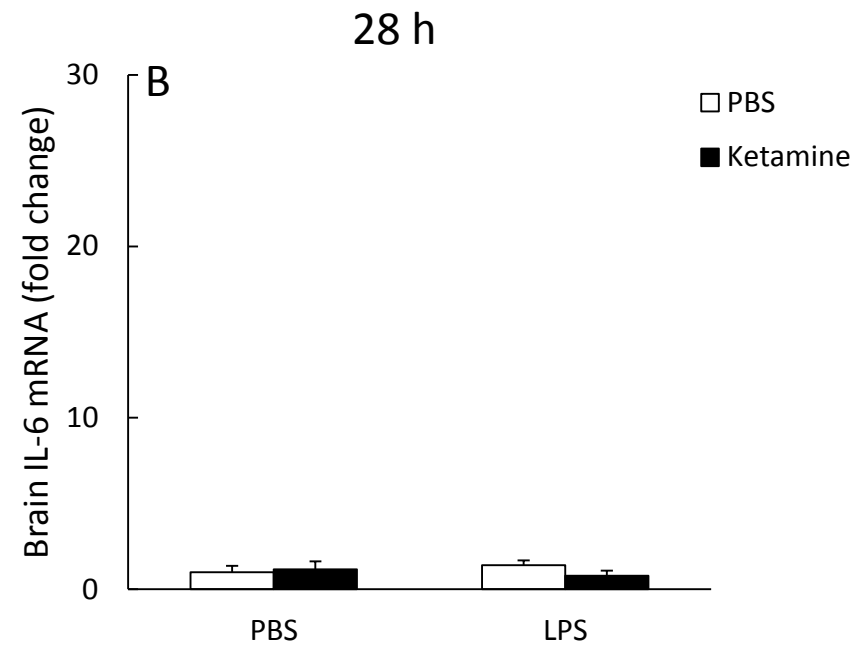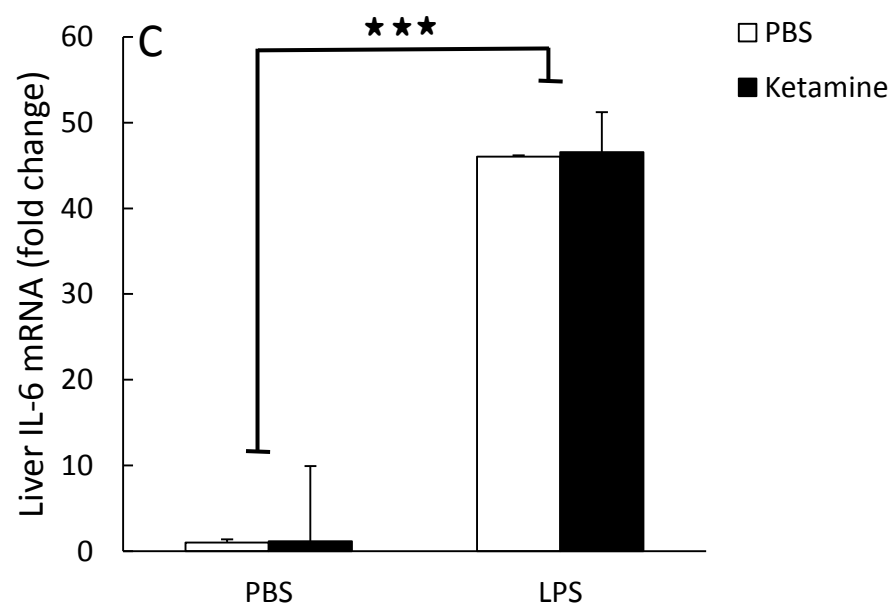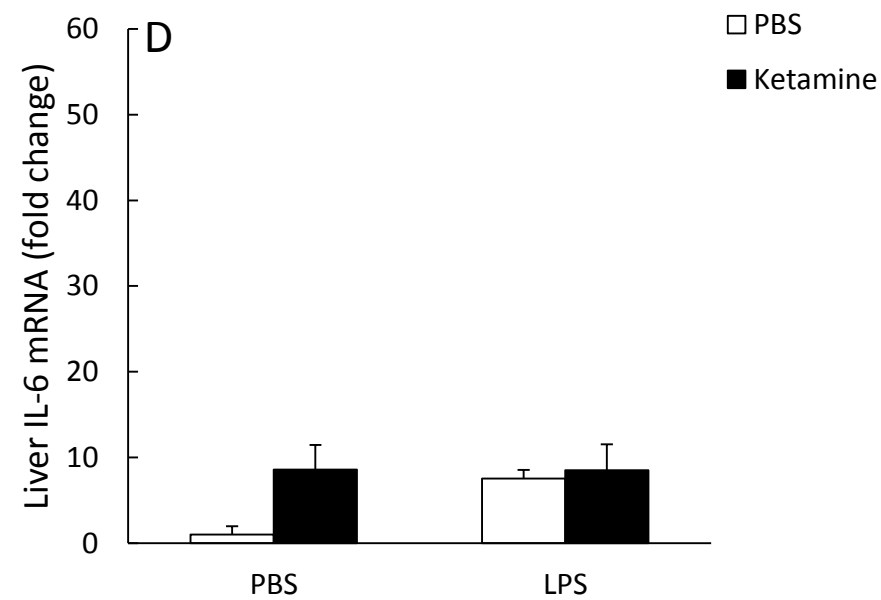

Figure S3.

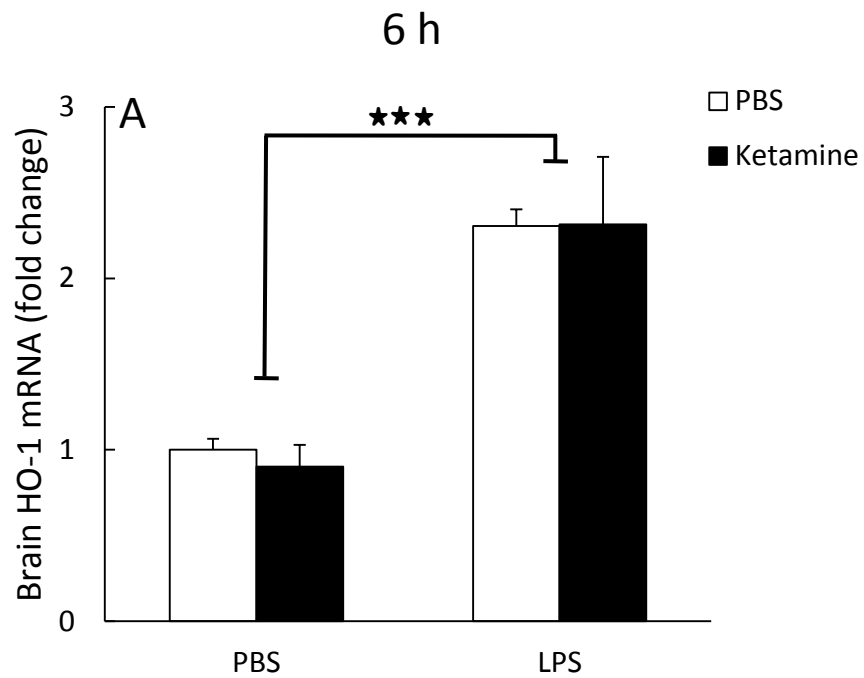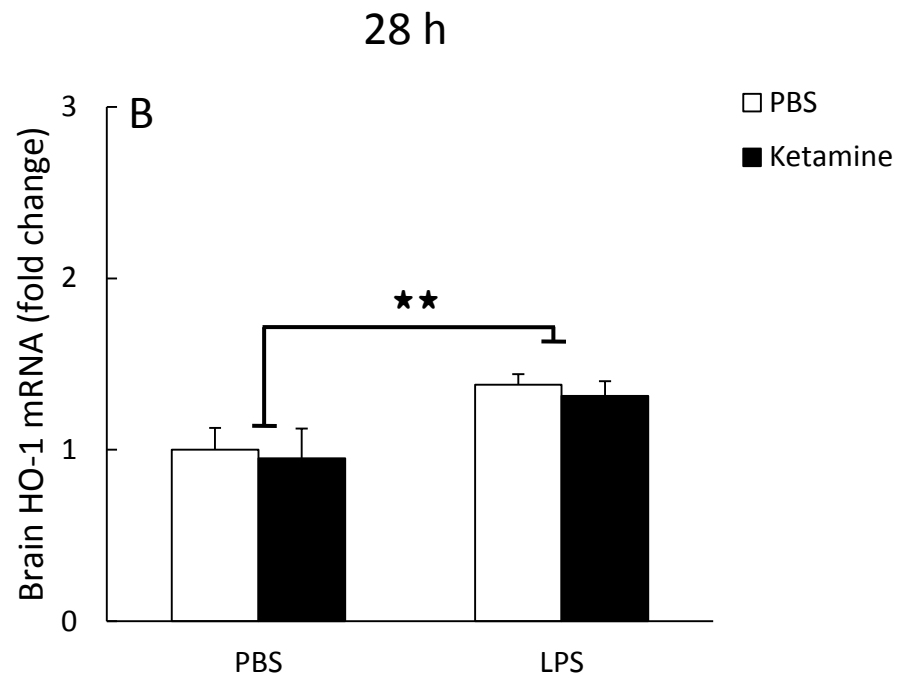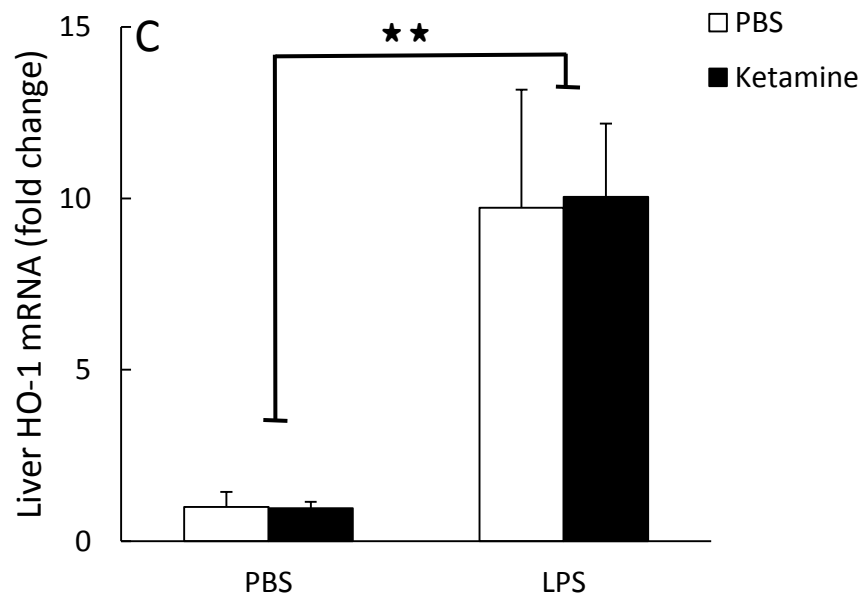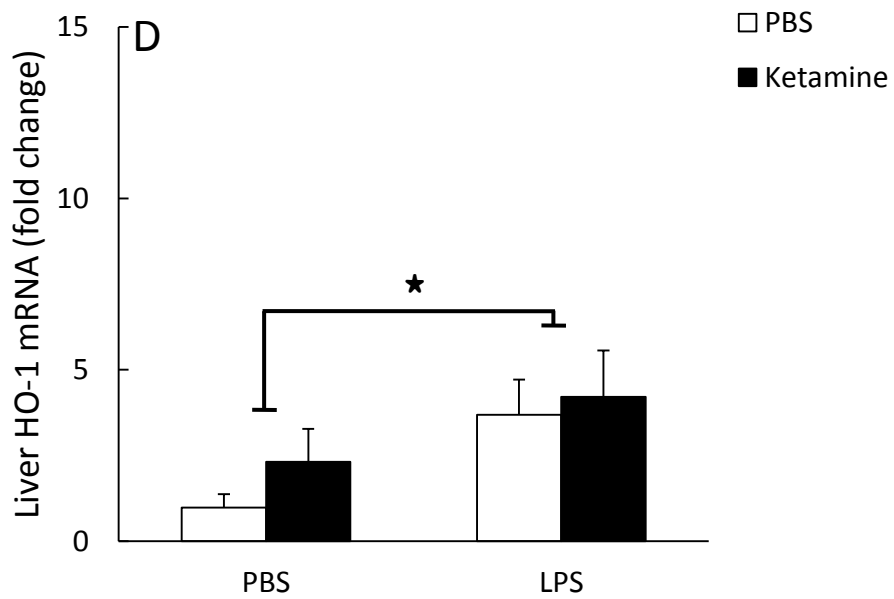

Figure S4.

6 h

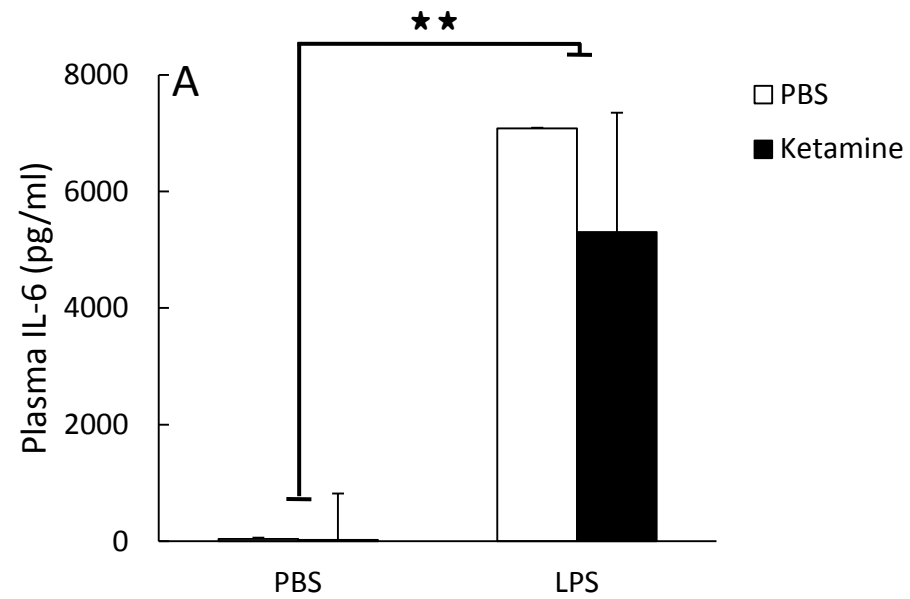

28 h

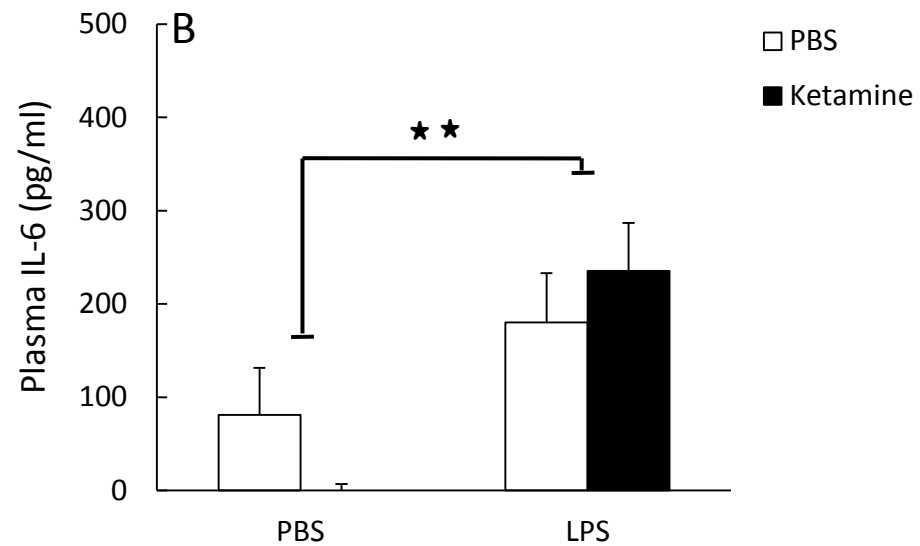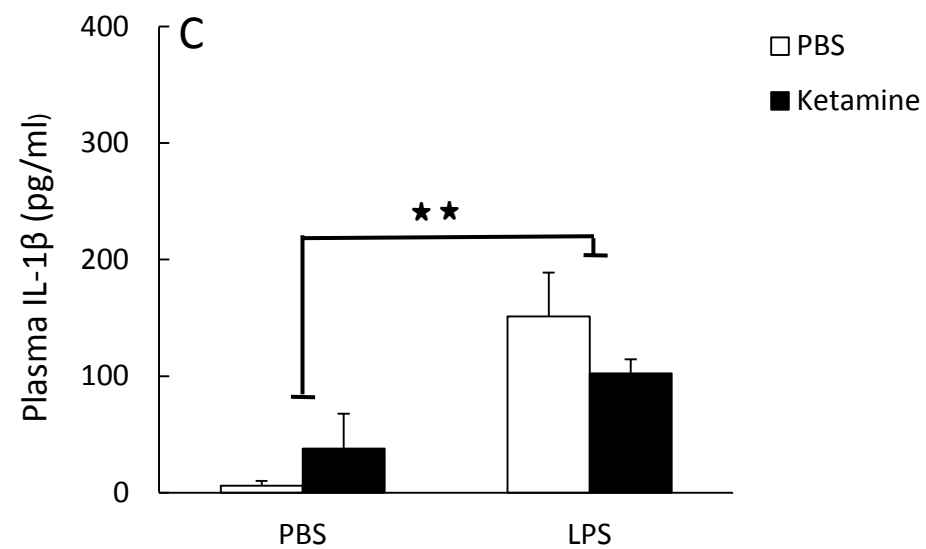

Figure S5.

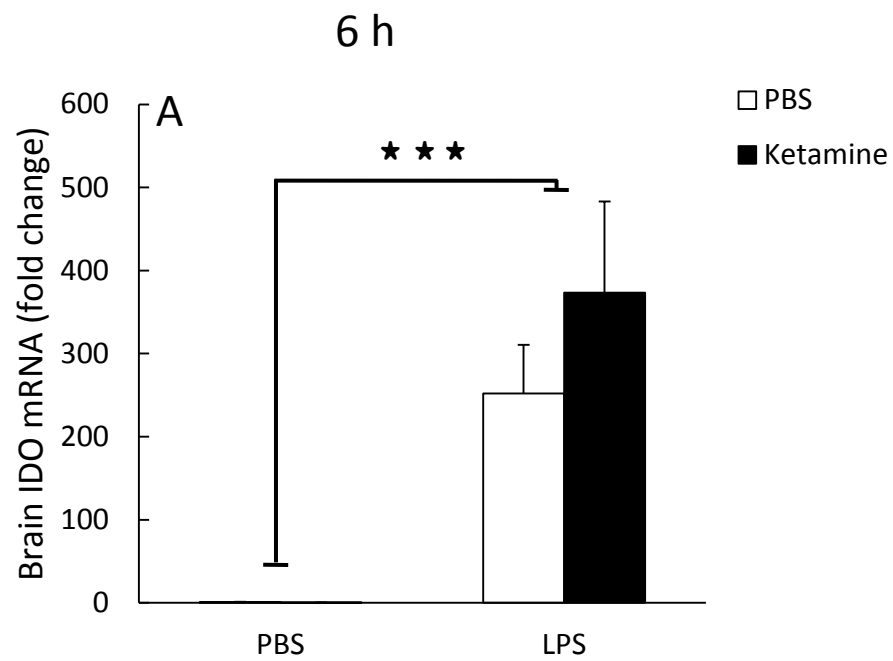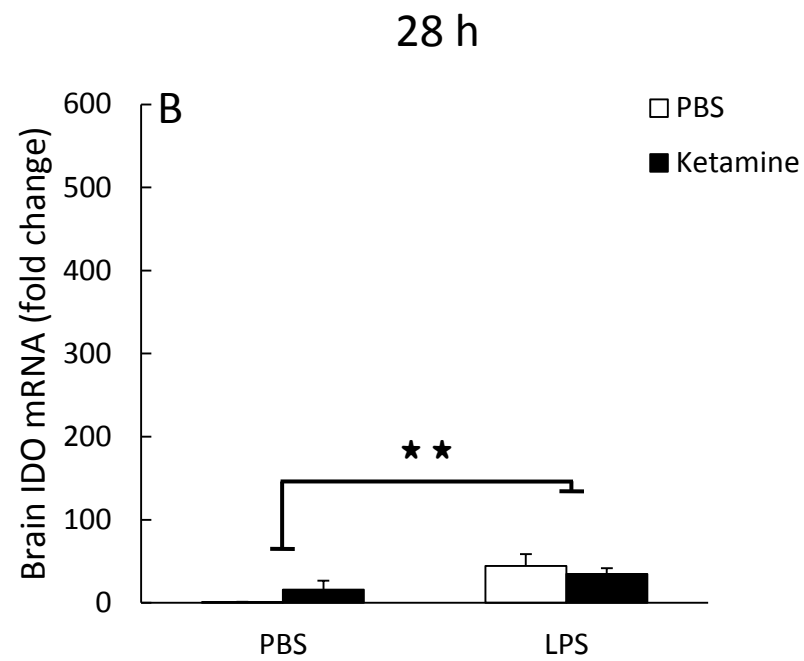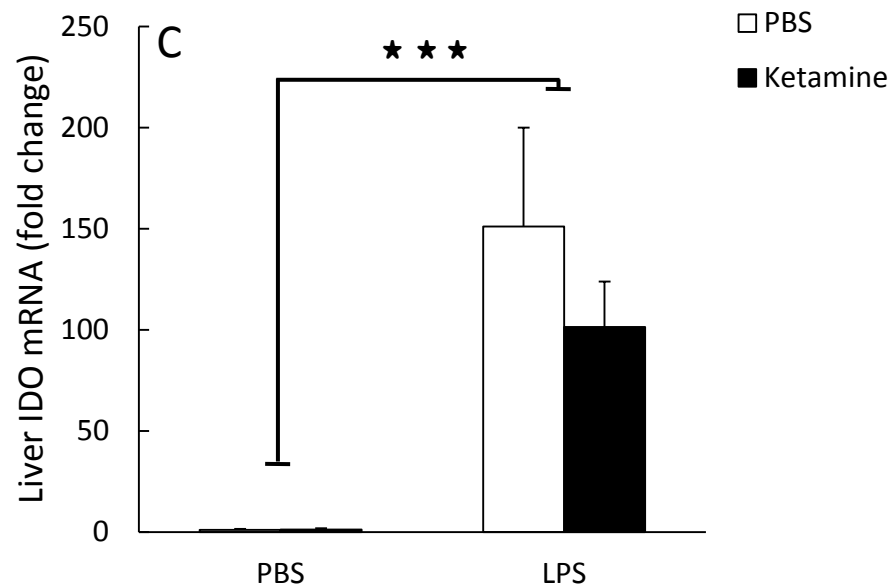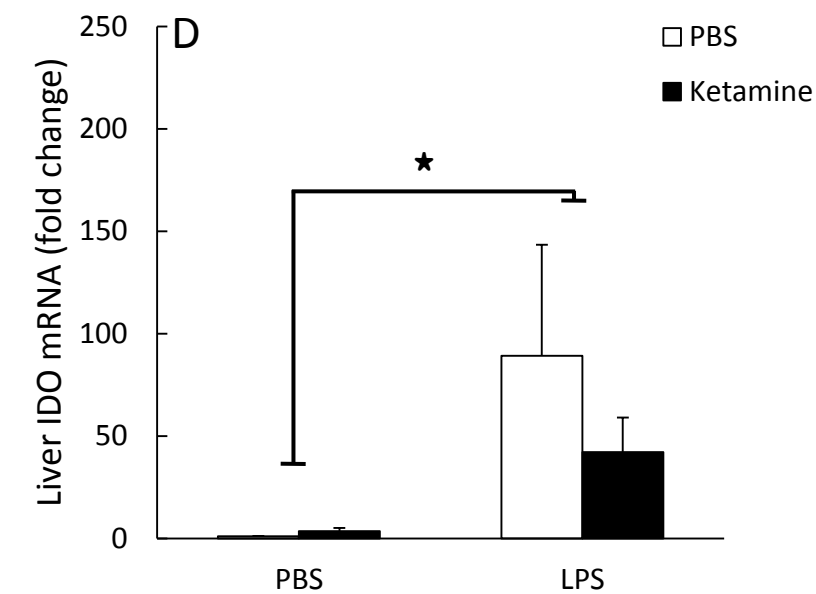

Figure S6.

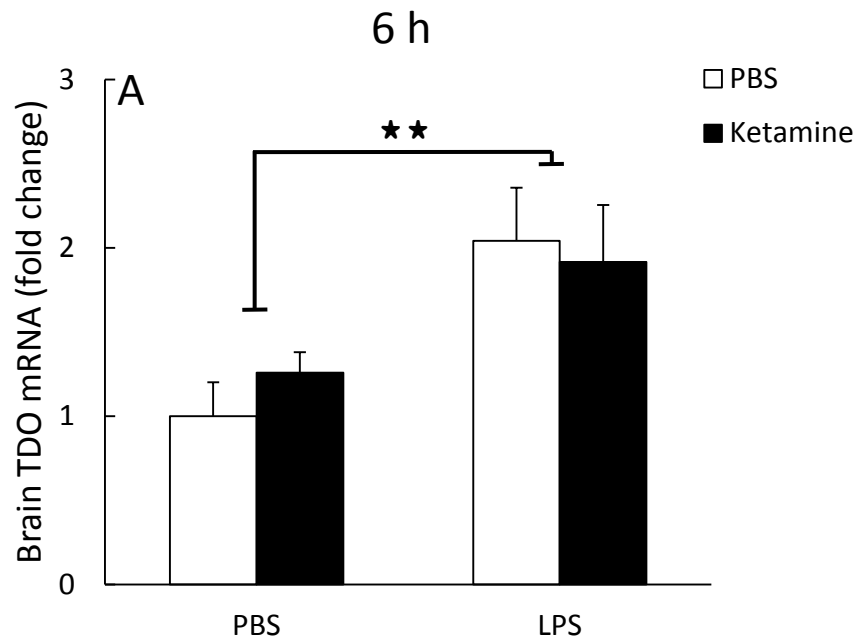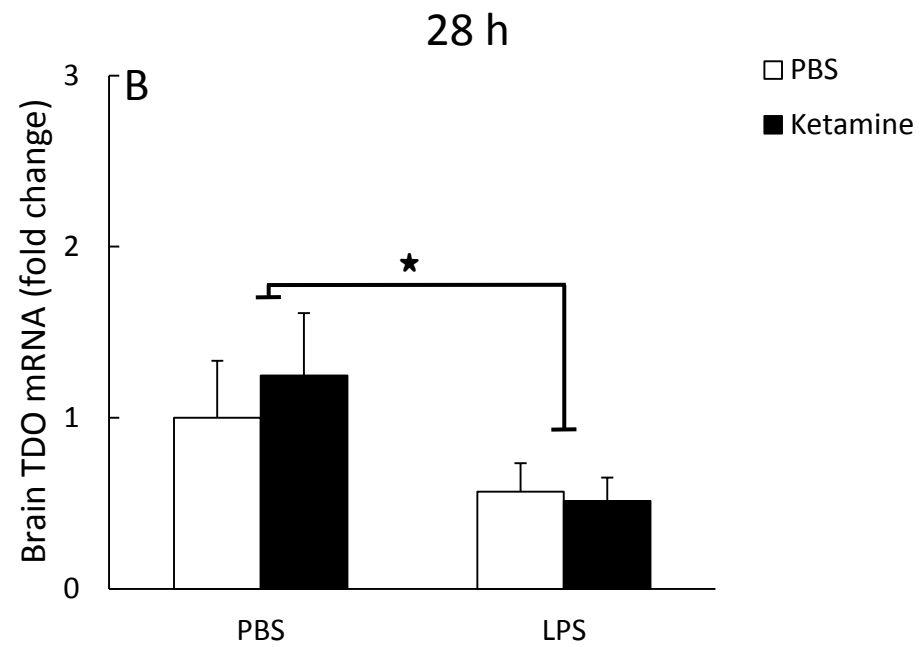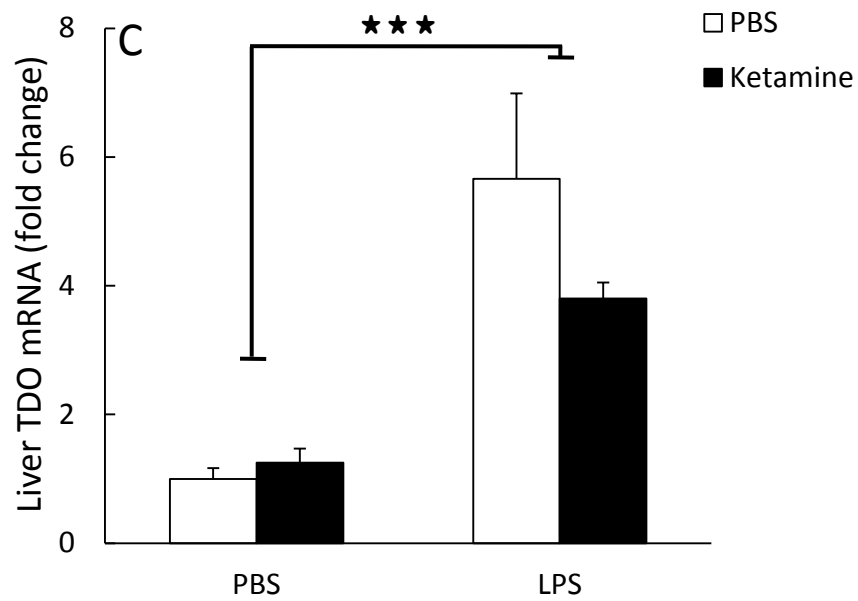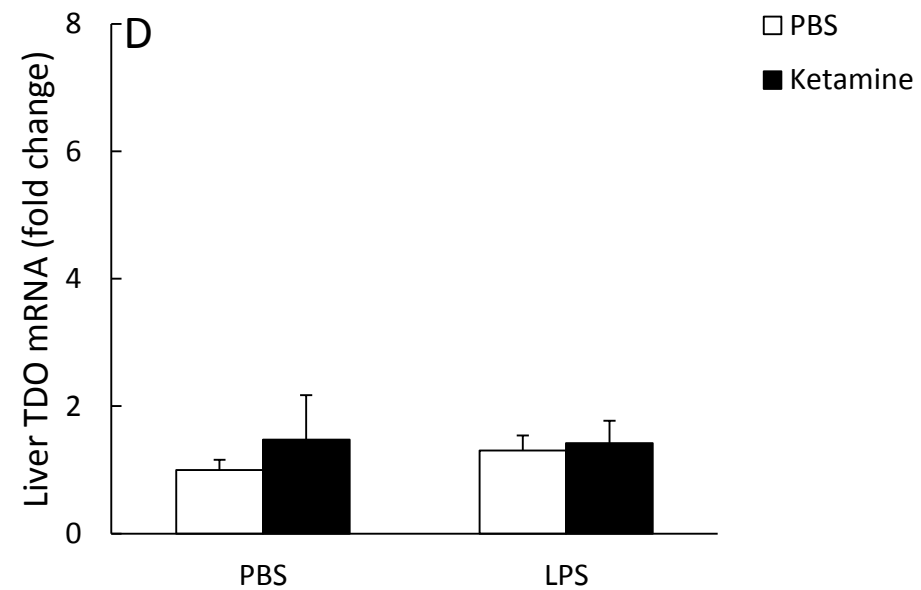

Figure S7.

6 h

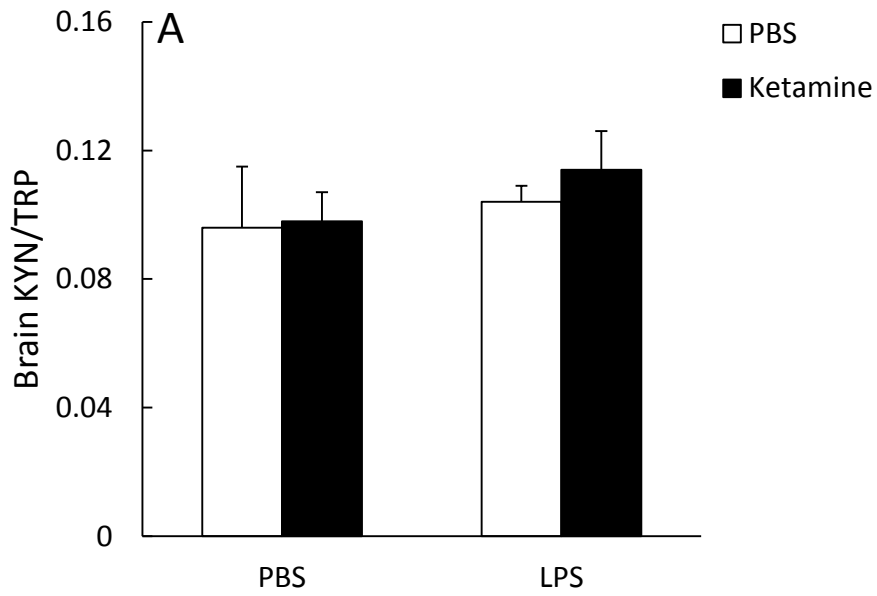

28 h

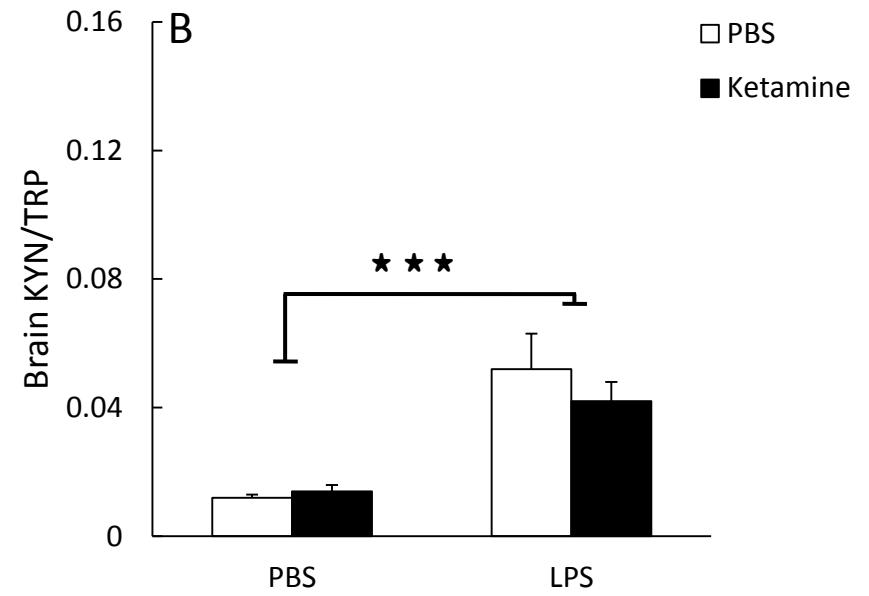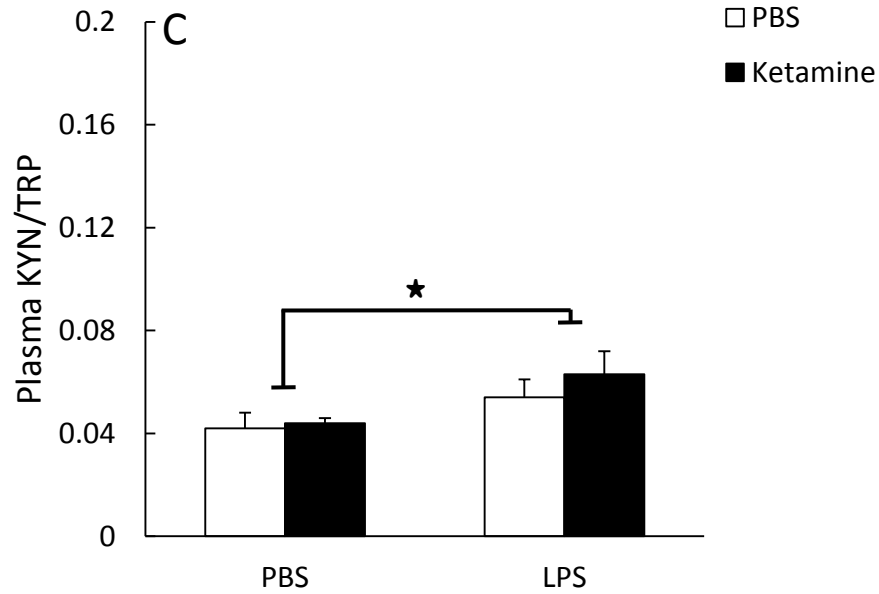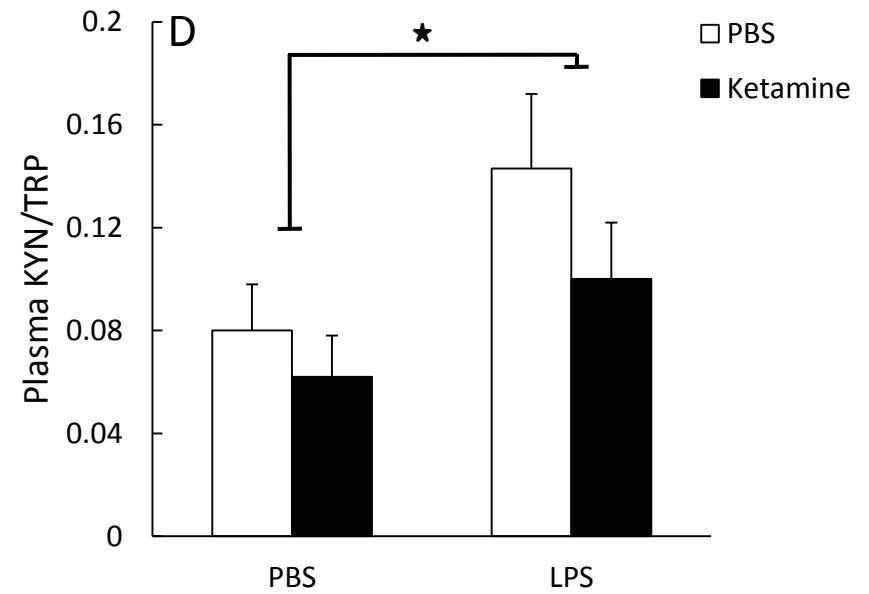

Figure S8.

6 h

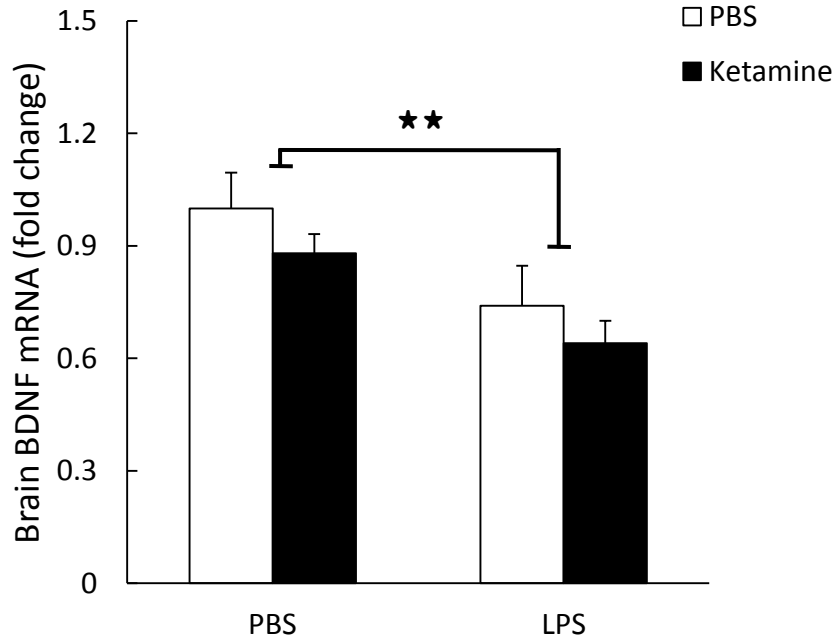

28 h

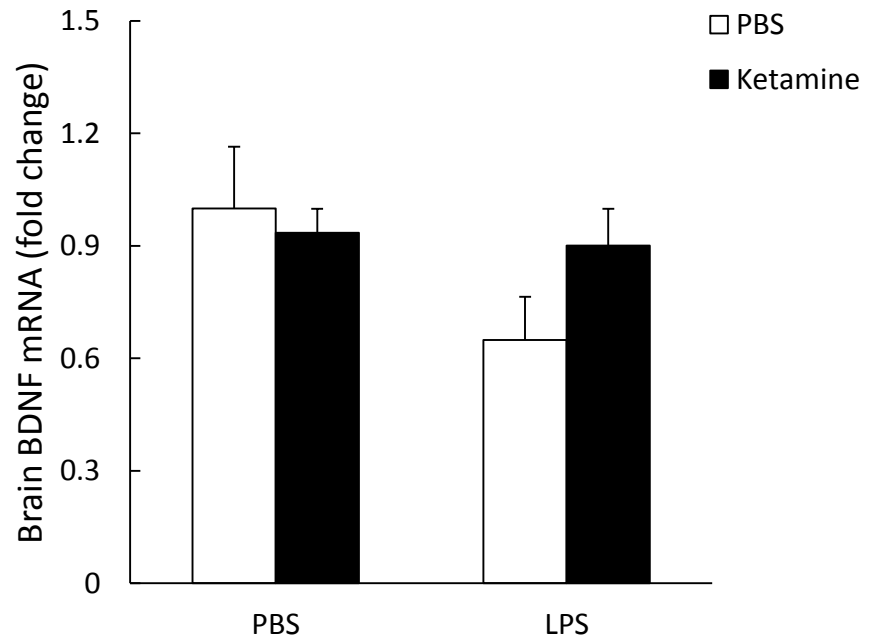

Figure S9.



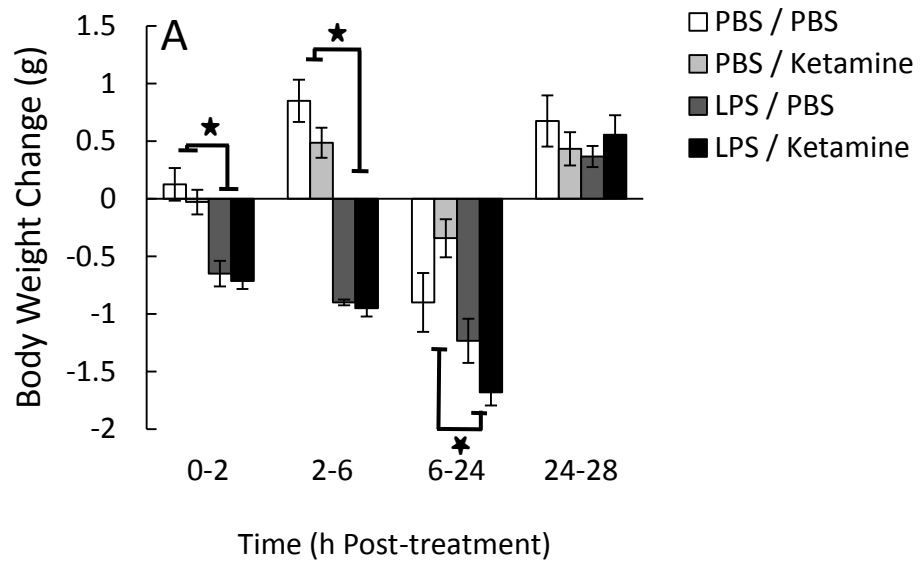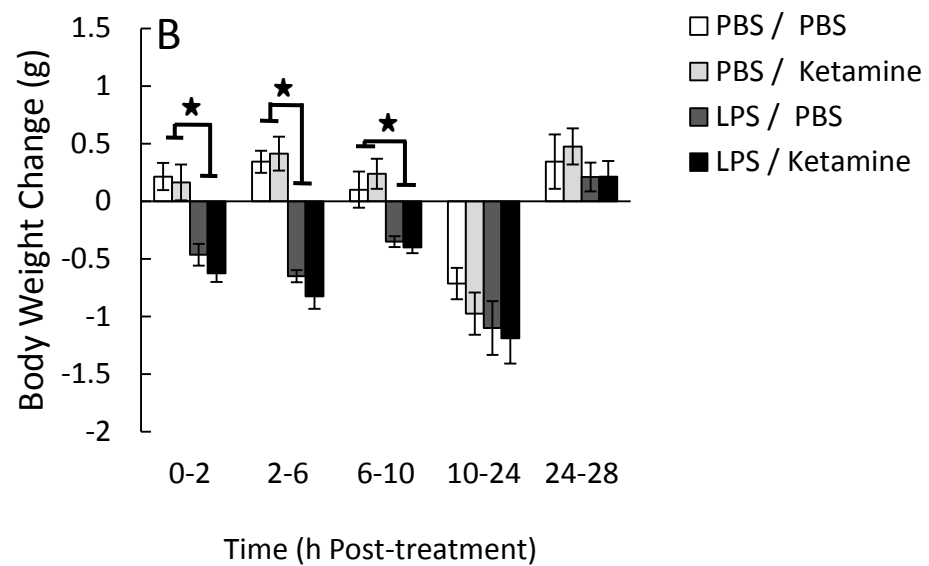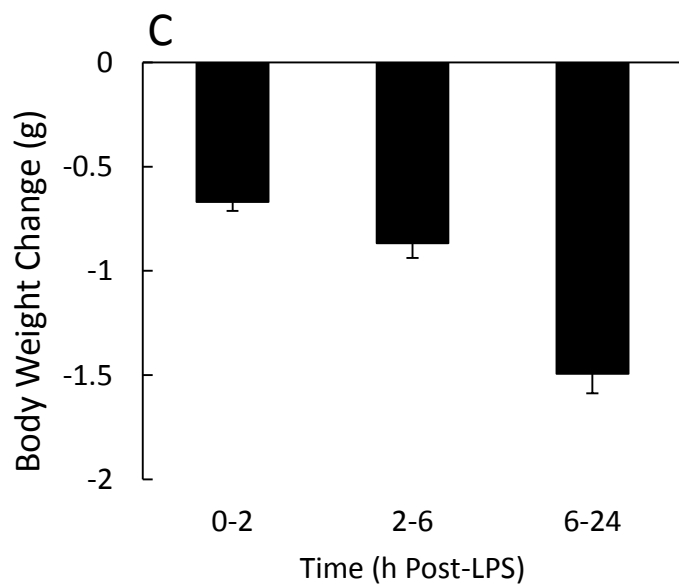

Figure S10.

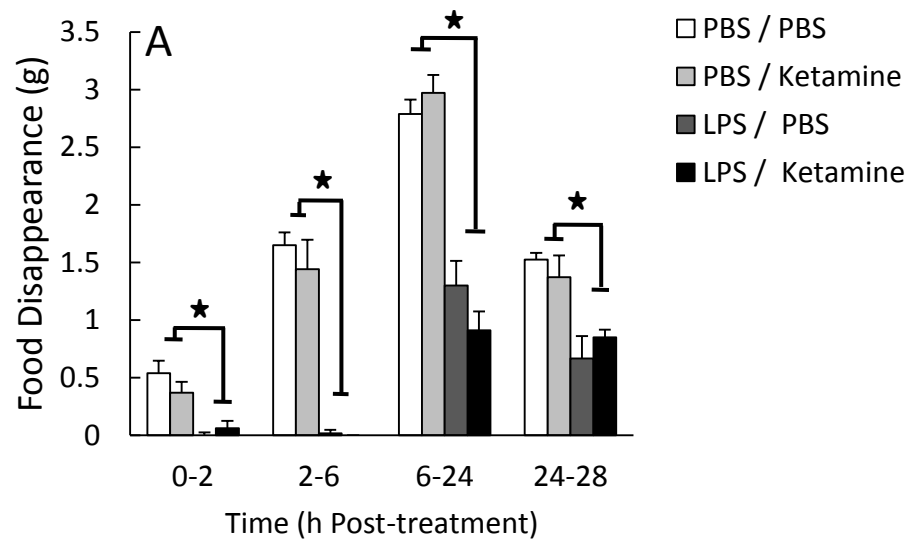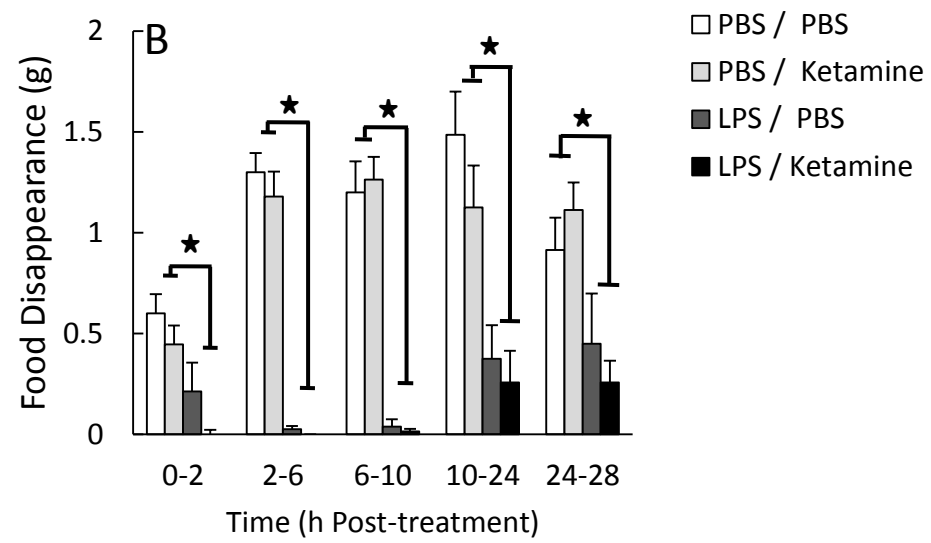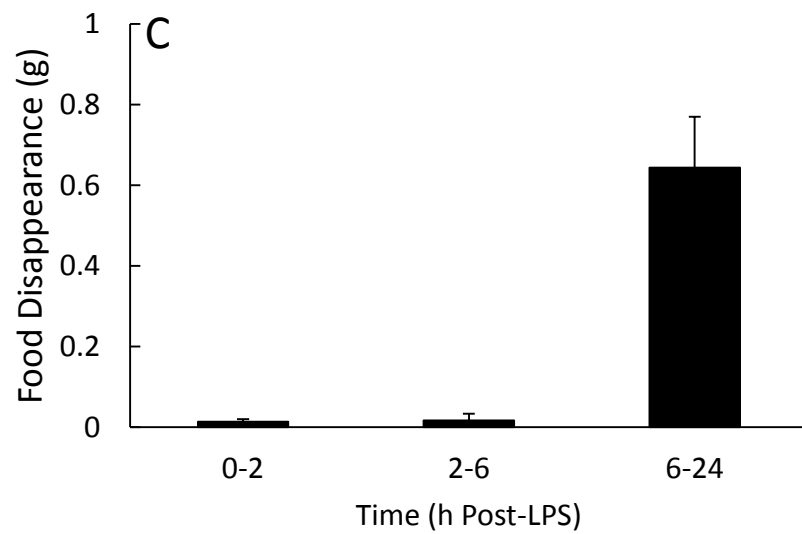

Figure S11.

Supplement: npp201371x1.pdf [file npp201371x1.pdf]

## 2 and 24 h

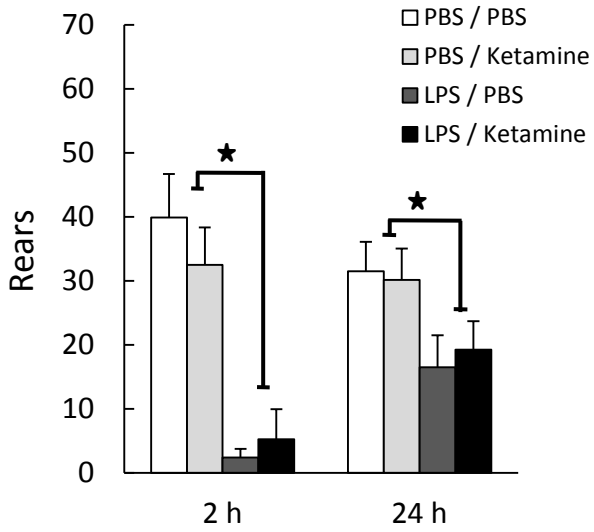

## 5.5 h

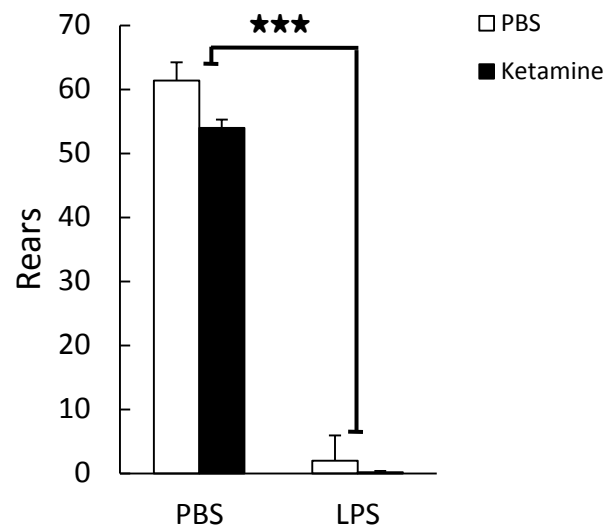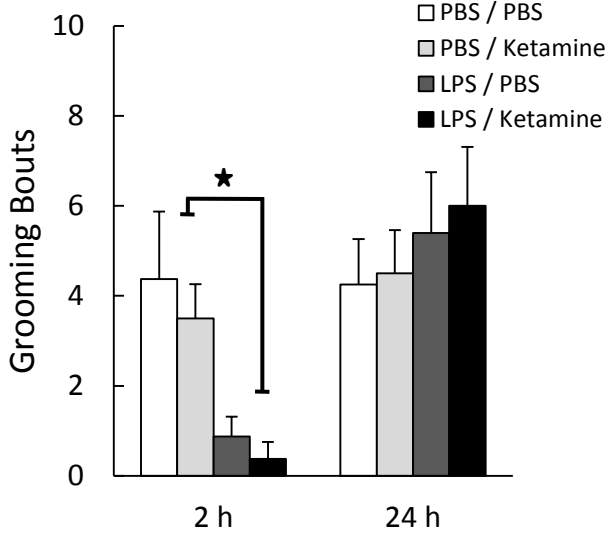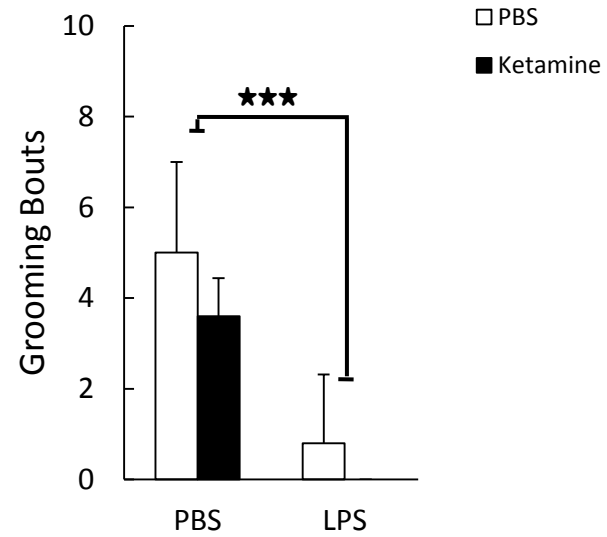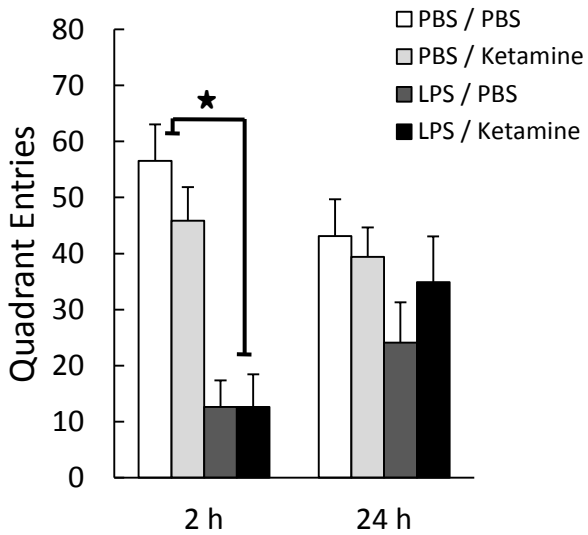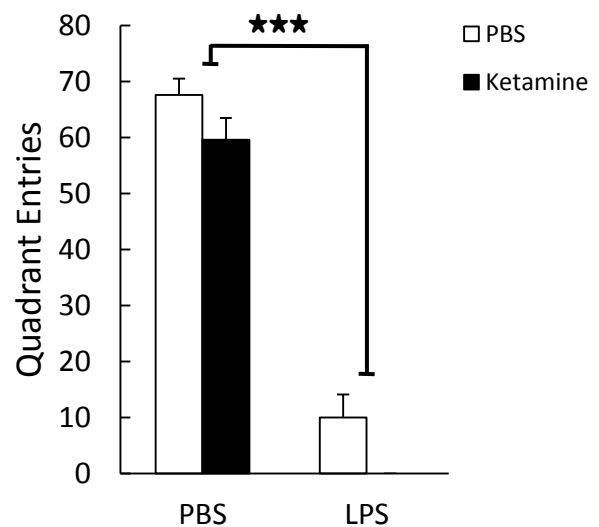

Figure S2.

Supplement: npp201371x2.pdf [file npp201371x2.pdf]

### Ketamine 24 h Prior to LPS

### Ketamine 10 h post-LPS

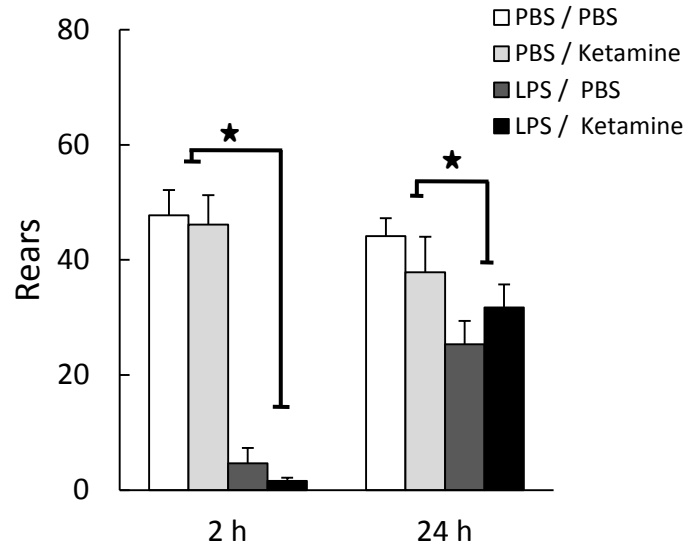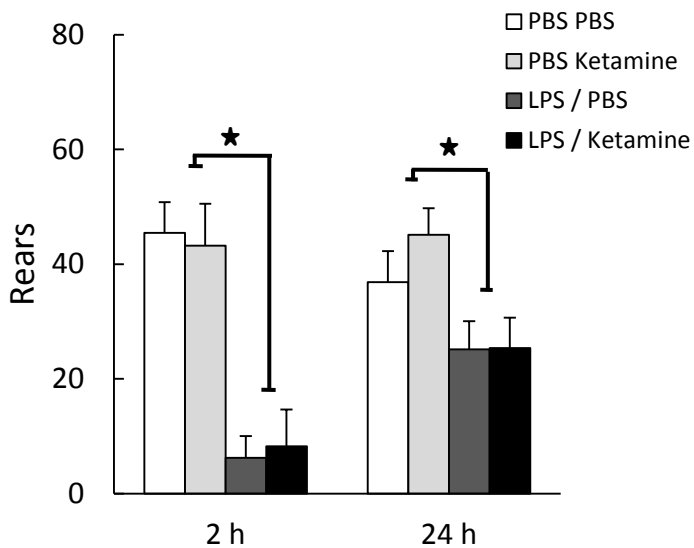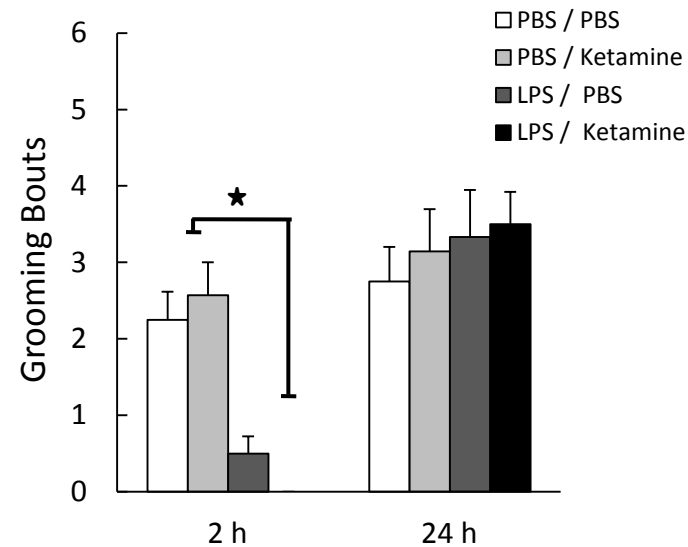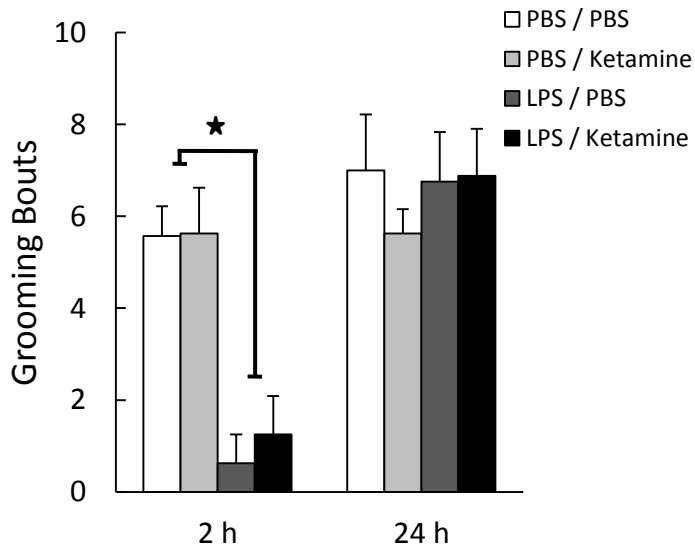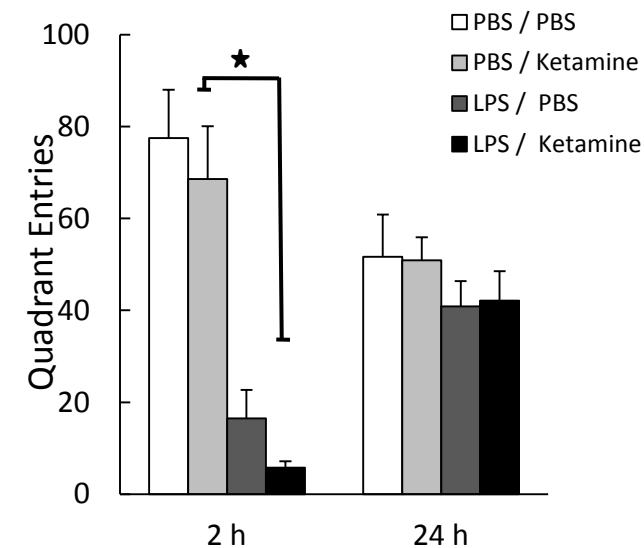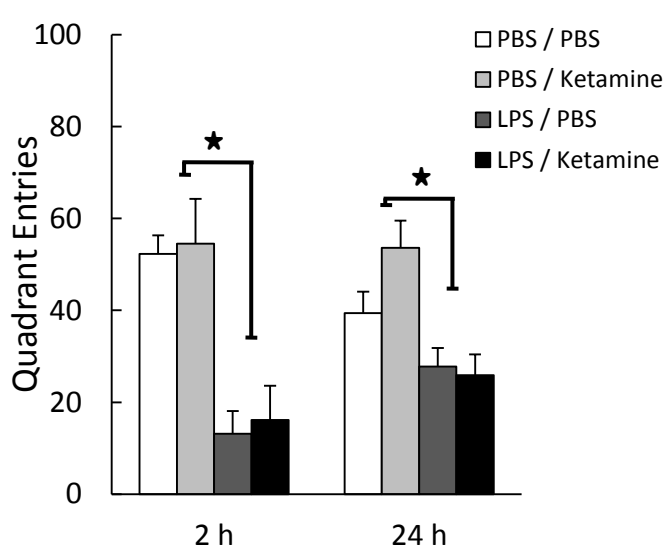

Figure S12.

Supplement: npp201371x3.pdf [file npp201371x3.pdf]
